# Supplementary material for: Visible-light-initiated Sonogashira coupling reactions over CuO/TiO2 nanocomposites
Source: Royal Society of Chemistry journal article supplement (doi:10.1039/c8cy02333f), 2018-12-03

**Supporting Information of**  
**Visible-Light-Initiated Sonogashira Coupling Reactions over**  
**CuO/TiO<sub>2</sub> Nanocomposites**

Yuanyuan Li, Xue Feng, Zhaohui Li\*

Research Institute of Photocatalysis, State Key Laboratory of Photocatalysis on  
Energy and Environment, College of Chemistry, Fuzhou University, Fuzhou 350116,  
P. R. China

---

\* Author to whom all correspondences should be addressed.

E-mail: [zhaohuili1969@yahoo.com](mailto:zhaohuili1969@yahoo.com)

**Fig. S1** XRD diffraction patterns of (a)  $\text{SiO}_2$ ; (b)  $\text{CuO}$ ; (c) 20wt%  $\text{CuO}/\text{SiO}_2$  nanocomposite.

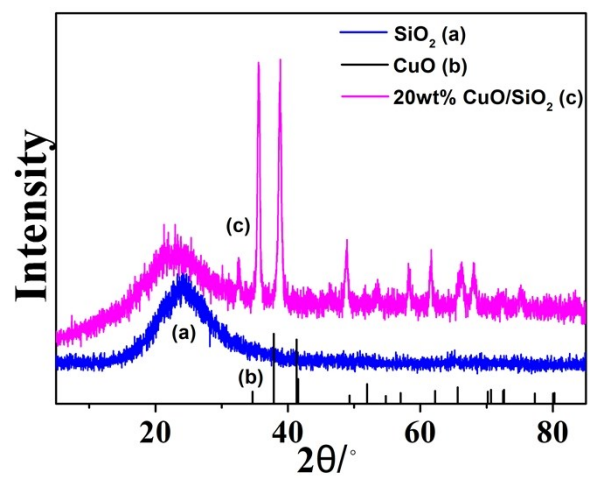

**Fig. S2** EDX mapping images of 20wt% CuO/TiO<sub>2</sub>.

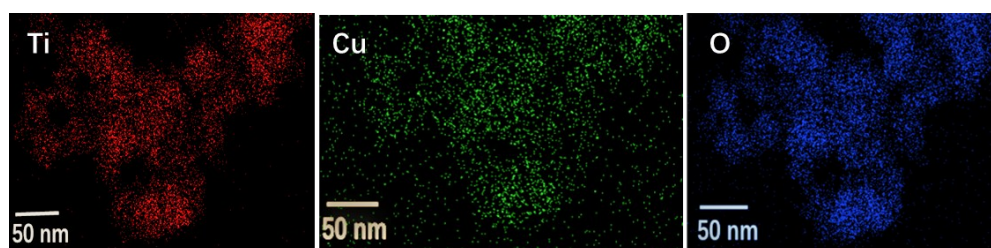

Supplement: c8cy02333f1.pdf [file c8cy02333f1.pdf]
